1 Quality Improvement Report

2  
3 **Improving the impact of pharmacy interventions in hospitals**

4  
5 Rafael Baptista<sup>1\*</sup>, Mary Williams<sup>2</sup>, Jayne Price<sup>1</sup>

6  
7 <sup>1</sup> Medicines Management, Powys Teaching Health Board, Hafren Ward, Bronllys Hospital, Brecon, Powys, LD3 0LU,  
8 UK.

9 <sup>2</sup> Cardiff School of Pharmacy & Pharmaceutical Sciences. King Edward VII Avenue, Cardiff CF10 3NB, UK.

10  
11 \*Correspondence to Dr Rafael Baptista: [rafael.baptista@wales.nhs.uk](mailto:rafael.baptista@wales.nhs.uk).

12  
13  
14 **Abstract**

15  
16 The interventions of pharmacy professionals are considered impactful inputs towards optimised  
17 patient care and safety, by rationalising prescriptions, enhancing therapeutic choices and reducing  
18 and preventing medication errors and adverse effects. Between October 2020 and October 2021, the  
19 community hospitals at Powys Teaching Health Board recorded 158 interventions, corresponding to  
20 0.4 interventions per pharmacy staff per week. Predominantly, only two members of the team were  
21 recording these pharmacy interventions (PIs). Poor indicative PIs can result in lost opportunities for  
22 medication optimisation and prescribing rationalisation, increased costs and unidentified education  
23 and training potentials.

24 The aims of this project were (1) to record 180 interventions between 22/11/2021 and 08/04/2022  
25 (20 weeks), corresponding to an average 3-fold increase, compared to the interventions recorded  
26 between October 2020 and October 2021 (52 weeks); (2) to have all hospital pharmacy staff  
27 recording at least one intervention during the same period.

28 The number of interventions recorded and the number of pharmacy staff recording each intervention  
29 were two process measures. The project was completed through two Plan-Do-Study-Act (PDSA)  
30 cycles and applied theory on managing change in healthcare.

31 The most successful intervention influencing positively the process measures was the  
32 implementation of a new Pharmacy Intervention Record Tool (xPIRT) toolkit that included an online  
33 recording tool (xPIRT) and an interactive panel with up-to-date results from all interventions  
34 recorded (xPIRT Dashboard). Motivating change was proven to be one of the best determinants of

35 user satisfaction and engagement that contributed to meet the project’s targets. xPIRT Dashboard  
36 provided staff the capacity to act on possible personal motivators and the possibility to improving  
37 care with medicines on their wards. The implementation of xPIRT toolkit was able to increase the  
38 representativity and significance of PIs recorded by the hospital pharmacy team and it is expected to  
39 be used for personal professional development, demonstrating team activity and impact, service  
40 planning, prescribing practice optimisation, and to identify education/training needs. This toolkit can  
41 be easily applied and adapted to other health organisations, settings and services.

42

43 **Keywords:** quality improvement, optimised prescribing, medication errors, drug safety, patient care.

44

45 Word count: 3174

46 Reference Count: 30

47

48

49

50

## 51 **Problem and aims**

52

53 This project focused on evidencing the impact of interventions made by pharmacy professionals  
54 (pharmacists and pharmacy technicians) in Powys Teaching Health Board community hospitals  
55 (PTHB), Wales. Optimising learning from these interventions will influence positively patient safety  
56 and quality of care.[1,2] Poor indicative pharmacy interventions (PIs) can result in reduced  
57 opportunities for medication optimisation and prescribing rationalisation, increased costs and  
58 unidentified education and training potentials.

59 Between October 2020 and October 2021, the Medicines Management (MM) team (MM) of PTHB  
60 have registered 158 interventions from two hospital pharmacy professionals — or 28.6% of the total  
61 number of the pharmacy team (PT) staff. This corresponded to an average of 0.4 interventions per  
62 pharmacist/pharmacy technician per week. These figures were not a true representation of the work  
63 that the hospital PT develop in Powys and failed to collect representative data.

64 The aims of this project were: (1) the hospital PT in Powys to record at least 180 interventions  
65 between 22/11/2021 and 08/04/2022 (20 weeks), corresponding to an average 3-fold increase of the  
66 number of PIs recorded between October 2020 and October 2021 (52 weeks); (2) to have all PT staff  
67 recording at least one intervention during the same period, corresponding to an increase of 75% in

68 the number of staff recording interventions. These goals were based on staffing numbers, their  
69 working hours, and targets set up by the MM team in Powys.

70

## 71 **Background**

72

73 The interventions of pharmacy professionals are considered valuable inputs towards optimised  
74 patient care and safety, by rationalising prescriptions and reducing and preventing medication  
75 errors.[3] Multiple reports have concluded that pharmacy professionals were able to reduce the  
76 length of stay of hospital inpatients[4] reduce readmission rates,[4,5] decrease the number of adverse  
77 drug reactions,[6] promote better medicines use and adherence,[7–9] and discontinue inappropriate  
78 prescribed medicines.[10]

79 Besides the consensus on the positive clinical impact of PTs, more cost-consequence analyses are  
80 needed to evaluate the economic outcomes of these interventions. Nonetheless, several research  
81 articles and meta-analysis concluded PIs contribute for more cost-effective prescribing choices  
82 across a range of clinical conditions.[11–14] The economic impact of PIs may inform stakeholders  
83 and decision-makers for policies that support more pharmacy funding to hospitals and community  
84 pharmacies.[15]

85 Several strategies have been used to assess the clinical impact of PTs worldwide. The All Wales  
86 Intervention Database (AWID) is available for the health boards in Wales. The Pharmacists Achieve  
87 Results with Medications Documentation (PhARMD), a template that captures interventions and  
88 outcomes of clinical pharmacists in an integrated healthcare system, is currently being used in  
89 several hospitals in the United States of America.[3] Other recording tools have been previously  
90 reported.[16–18]

91

## 92 **Baseline measurement**

93

94 An initial baseline study was conducted on the recorded interventions by the hospital PT in Powys  
95 between October 2020 and October 2021. The only available tool used to collect this information  
96 was AWID. Data collected — date, number of interventions and identification of the contributor —  
97 was organised in a Microsoft Excel spreadsheet. A total of 158 interventions was recorded by two  
98 pharmacy professionals. The calculated median was zero due to the lack of consistent data  
99 throughout the period (Figure 1).

100

101

102 **Design**

103 The first author of this report was secured as ‘champion’ for this project and implemented all PDSA  
104 methodology and quality improvement strategies. The PIs recorded by the author were not  
105 considered in the project, reducing the risk of bias.

106 The process measures of the project were the number of interventions recorded and the number of  
107 staff recording them. The outcome measures were the number of new local guidelines being  
108 considered/written for Powys’ hospitals, based on the interventions recorded, and the awareness level  
109 of the PT for recording PIs.

110 In this project, it was important to understand unintended consequences of the changes that were  
111 implemented. Thus, the average time taken to record one intervention was indicated as a balancing  
112 measure, to ensure that recording interventions would not have a considerable impact in the existing  
113 pharmacy services on the wards of Powys hospitals. The time taken to record interventions was  
114 automatically retrieved via Microsoft Forms.

115

116

117

118

119

120

121

122

123

124

125

126

127

128

129

130

131

132

133

134

135

136 **Strategy**

137

138 Two Plan-Do-Study-Act (PDSA) cycles were undertaken over a 20-week period. Table 1 provides a  
 139 summary of these details.

140

141 Table 1 – Overview of the study design with specific changes in each PDSA cycle listed.

| PDSA cycle           | Contributors for inadequate record of PI                             | Changes                                                                                                                                                                                                         |
|----------------------|----------------------------------------------------------------------|-----------------------------------------------------------------------------------------------------------------------------------------------------------------------------------------------------------------|
| PDSA 1<br>(10 weeks) | Existing tools – AWID – are not easy to use.                         | Implementation of a new <u>Pharmacy Intervention Record Tool</u> — xPIRT — via Microsoft Forms.                                                                                                                 |
|                      | MM leadership did not inform the team of the importance of PI.       | To remind and motivate the PT every Monday, via email.                                                                                                                                                          |
|                      |                                                                      | Any small changes on xPIRT should be implemented within 24 hours, after emailed feedback.                                                                                                                       |
|                      | Time limitation.                                                     | Reassurance that xPIRT is an easy-to-use form that would take less than 5 minutes to complete per intervention.                                                                                                 |
| PDSA 2<br>(10 weeks) | Interventions’ results were not accessible for users.                | Implementation of xPIRT Dashboard (via Microsoft Power BI), where all instantly updated results are readily available to all PT, via Microsoft Teams.                                                           |
|                      | Intervention’s results were not editable.                            | Creation of a sharable file, xPIRT List, (via Microsoft Lists) where results can be editable.                                                                                                                   |
|                      | Lack of awareness on the purpose/use of the data from interventions. | PT advisory meeting with intervention of the Head of Community Services/Pharmacy about the use of xPIRT and its data – local clinical governance meetings, inform local clinical guidelines and training needs. |
|                      | Time limitation.                                                     | PT advisory meeting with reassurance that, in order to meet the project’s targets, each PT staff would only need to invest 3 minutes per week on xPIRT.                                                         |

142 AWID – All Wales Intervention Database; MM – Medicines Management; PDSA – Plan-Do-Study-Act; PT – pharmacy  
 143 team; xPIRT – Pharmacy Intervention Record Tool.

144

145 **Plan-Do-Study-Act (PDSA) cycle 1**

146

147 To complement the baseline data, two surveys were completed by stakeholders (PT members, ward  
148 managers and ward doctors), to evaluate the understanding and satisfaction with the current methods  
149 of recording PIs.

150 All ward managers and prescribers initially surveyed agreed or strongly agreed that pharmacy  
151 interventions change practice, improve patient safety and support service planning, and would make  
152 them more aware of the role of the pharmacy teams in hospitals.

153 A stakeholder analysis was completed to establish priorities and differentiate stakeholders based on  
154 their power/ interest in the project. Although essential stakeholders, ward managers and prescribers  
155 were considered to have low power in the project, as this change focused more on the pharmacy  
156 teams. In order to meet the aims of the project, these stakeholders would only be consulted in the  
157 beginning of the project.

158 The PT stakeholders revealed that 75% of the hospital PT have not recorded their interventions in a  
159 platform that maintained data security, between October 2020 and October 2021. Half of the PT did  
160 not record any interventions at all. A fishbone diagram (Supplementary Figure 1) depicted the issues  
161 encountered with the low number of interventions recorded. Further analysis showed that time  
162 limitation, poor existing recording tools – AWID –, and lack of information or targets set up by the  
163 MM leadership were the key factors that influenced the inadequate number of documented PIs  
164 (Supplementary Figure 2).

165 Following the collection of the baseline data, our findings were presented to the PT stakeholders, to  
166 encourage feedback and suggestions for improvement. Using the baseline data and feedback received  
167 in the meeting, a PDSA methodology was implemented to complete a quality improvement strategy  
168 over a 20-week period. Each PDSA cycle included a survey completed by all PT following by a short  
169 planning meeting for loop feedback.

170

171 A short meeting and feedback loop, with baseline data for PIs recorded between October 2020 and  
172 October 2021, was held with PT stakeholders in the beginning of PDSA cycle 1. After suggested  
173 changes were in place, data was collected using the new Pharmacy Intervention Record Tool —  
174 xPIRT (Supplementary Figure 3) — for 10 weeks, from 22/11/2021 to 28/01/2022. xPIRT was  
175 developed using Microsoft Forms. Punctual feedback and additional suggestions were sent via email  
176 and resolved within the same day.

177

178

179

## 180 **PDSA cycle 2**

181

182 A short meeting and feedback of an advisory survey took place before recording interventions for the  
183 second PDSA cycle. A driver diagram was built to better visualise the changes that needed to be  
184 implemented (Supplementary Figure 4).

185 In addition to the use of xPIRT, started in PDSA cycle 1, changes discussed in the meeting included  
186 the assessing and editing of intervention results. Thus, an editable file available online via xPIRT  
187 List with real-time recordings was shared with the PT, along with xPIRT Dashboard (Supplementary  
188 Figure 5), available on Microsoft PowerBI (Premium License). Thus, xPIRT Toolkit was then  
189 formed by xPIRT, xPIRT List and xPIRT Dashboard. This enabled the team to keep track of all  
190 interventions done and select them, interactively, by ward, contributor, date, drug, and severity. The  
191 overall intervention recording pathway is depicted in Supplementary Figure 5.

192 Other topics were addressed in the short meeting. Due to the reported time limitations, it was  
193 reassured that, in order to meet the goals of this project, all PT staff should only spend 3 minutes per  
194 week recording interventions, based on the Microsoft Forms calculated response time per submitted  
195 record. Also, due to questions related with accuracy of the data recorded, the project ‘champion’  
196 clarified his interventions were not considered when measuring improvement. Finally, due to  
197 feedback obtained, it was explained that this data collection would be valuable to use in local clinical  
198 governance meetings, would inform specific local guideline needs and could be used for personal  
199 continuing professional development (CPD).

200 After all suggested changes were put in place, data was collected using xPIRT for 10 weeks (from  
201 31/01/2021 to 08/04/2022). A final survey was sent to the PT stakeholders to evaluate and feedback  
202 on the changes implemented during the project.

203

## 204 **Results and Discussion**

205

206 In the first PDSA cycle, an increase in the average number of interventions recorded (14.7  
207 interventions per week) was registered, 63.3% above the target set for end of the project. The median  
208 number of interventions recorded rose to 12, indicating a clear improvement from the baseline.  
209 However, during this cycle not all the hospital PT, only 6 out of 8, have used xPIRT. Nonetheless,  
210 this cycle provided valuable information that the changes impacted positively on the number of  
211 interventions completed (Figures 1 and 2).

212 The second PDSA cycle also saw an increase in the average number of interventions recorded (14.8  
213 interventions per week), 63.9% above the target set for end of the project. The median number of  
214 interventions remained 12, indicating a clear improvement from the baseline but no different from  
215 PDSA cycle 1. A total of 254 interventions were recorded, 41.4% above the target. This target was  
216 achieved seven weeks before the end of the project (Figures 1 and 2).

217 Both aims of the project were met six weeks in advance of the end of the second PDSA cycle,  
218 signified when all members of the PT had recorded at least one intervention (Figures 1 and 2).

219  
220

221 Act-IP©, a website where French hospital pharmacists record their interventions,[19] was developed  
222 in 2006, due to the lack of validated tools for documenting PIs in hospitals in France. This website  
223 has recorded more than 800,000 PIs across 1100 hospitals by 3800 pharmacists, over the last 16  
224 years. This enabled the study of key issues in pharmacy practice such as identifying trends in  
225 interventions on groups of medicines, diseases or medical speciality, and determining factors  
226 associated with prescribers' PI acceptance.[20,21] As the authors concluded that most of the  
227 available tools did not measure the clinical, economic and organisational impact of PIs, the CLEO  
228 (Clinical, Economic and Organisational) scale was adapted Act-IP© v2.[18] However, the authors  
229 reference that the standardisation of documentation systems (e.g. information technology tools) of  
230 most of the PI recording tools are still defective.[22] With our project, the xPIRT Toolkit allowed  
231 integration of an easy and accessible tool which records clinical data and translated it to indicators of  
232 economic and organisational impact. The creation of the xPIRT Toolkit considered not only the  
233 identified needs for PI recording tools but was also driven by theory on managing change in  
234 healthcare.

235 By adopting a 'systems thinking' approach, people, tasks, technology, environment (physical,  
236 cultural, social) and organisational structures were all considered in the project.[23] The following  
237 considerations, explained below, were taken into account: (1) foundation concept, (2) multiple  
238 perspectives, (3) work conditions, (4) decisions' explanations and understanding and (5) analysis,  
239 interactions and performance variability and flow.

240 A clear understanding of the concept of the project by stakeholders with power was essential for a  
241 positive impact in quality. Improving knowledge dissemination contributes not only for better  
242 clinical practice but also for enhanced performance in service improvements.[24] Knowledge  
243 translation in this project was achieved by making explicit the purpose and structure of the  
244 communication methods.[24] This project used a range of active-passive interactions to convey  
245 information: infographics, workshops, emails and short talks. All different strategies allowed the PT



246 stakeholders to understand the importance of recording PIs, an important outcome measure. From the  
247 baseline data gathered, 87.5% of the PT suggested that the record of PIs was important, with this  
248 figure rising to 100% at PDSA cycle 2. Additionally, the same group of stakeholders considered that  
249 the advantages of recording PIs would outweigh possible disadvantages (from a baseline of 49.9% of  
250 the PT, to 85.7% at PDSA cycle 2).

251 Multiple perspectives from all stakeholders were considered. The use of anonymous staff feedback  
252 and rapid engaging techniques are known to contribute for improved service quality.[25,26] The use  
253 of anonymous surveys, in PDSA cycles 1 and 2, and continuous engagement via weekly emails,  
254 allowed the project to take on board essential feedback that contributed for building the xPIRT  
255 toolkit. In the short talk post-survey analysis, all ideas were considered but only some were applied.  
256 However, no discarded ideas were left without an adequate explanation. At the PDSA cycle 1, 80%  
257 of the PT considered that all their suggestions were considered, with this figure rising to 85.7% by  
258 the second PDSA cycle.

259 A focus was also given to the PT work conditions. The average time to complete one intervention, an  
260 important balancing measure of the project, was calculated to be in average 2.46 min in PDSA cycle  
261 1 and 2.42 min in PDSA cycle 2. Although the average time to record one intervention did not  
262 change significantly between PDSA cycles ( $P = 0.903$ ,  $t=0.1221$ ,  $df=285$ , independent unpaired t-  
263 test), 83.3% of the PT indicated that recording PIs were a challenging competing priority with ward  
264 work at PDSA cycle 1, with this figure decreasing to 71.4% at PDSA cycle 2. This was achieved by  
265 avoiding the interesting concept of ‘projectness’ referred by Dixon-Woods et al.[27] Exhaustive  
266 project-centric ideas or conversations were avoided during surveys or short talks, reducing the risk of  
267 alienating staff. By acknowledging that PI would take some time from ward work and by keeping  
268 goals realistic and achievable, the PT staff was able to successfully participate and engage with the  
269 project.

270 The last point of ‘systems thinking’ regarding analysis, interactions and performance variability and  
271 flow was considered by applying three effective approaches: (1) relationship-, (2) motivational- and  
272 (3) value-based.

273 As relationship-based quality improvement strategies are often well succeeded due to easier  
274 coordination processes[28] this project made sure that tight communication channels were kept with  
275 every single PT staff.

276 The theory of motivating change describes the psychosocial-structural conditions for sustained  
277 change from the perspective of front-line staff. A total of 85.7% of the PT staff mentioned that  
278 xPIRT Dashboard would motivate them to record more interventions. The project intended to narrow  
279 the gap between intrinsic and extrinsic motivators. xPIRT Dashboard provided staff the capacity to

280 act on possible personal motivators and the possibility of improving care on their wards. In addition,  
281 witnessing effective change was motivating for the staff as positive outcomes provided a convincing  
282 argument for the need to sustain improvement activity [29]. For instance, xPIRT Dashboard allowed  
283 the identification of four different potential needs for local guidelines or formulary changes. This has  
284 been identified as another important outcome measure. Motivating change along with the  
285 implementation of xPIRT Dashboard may justify the success of the project in meeting both targets  
286 during the second PDSA cycle.

287 Lastly, a value-based approach was linked to the ‘systems thinking’ as it empowers frontline teams  
288 and can achieve a transformational outcome.[30] xPIRT Dashboard allowed each member of the PT  
289 to consult cost avoidance projections by recording their interventions, per member of staff and as a  
290 group. This not only improved extrinsic motivation but also improved team culture and project  
291 engagement, towards a continuous quality improvement.

292 Overall, the PT satisfaction on this project, an important outcome measure, improved from the  
293 baseline of 2.5/5 to 4.9/5 stars, at PDSA cycle 2.

294

## 295 **Limitations**

296

297 The significant variability within the PT presented as an important limitation for accurately assessing  
298 improvement, in this project. These variables included staffing numbers and profile, the number of  
299 days per week with ward cover by PT, and the information technology (IT) skill-mix.

300 It is known that recording interventions would have an impact on the PT ward work, as this could  
301 draw staff’s attention from patients. Although this was constantly fed back throughout the project, it  
302 is yet to be known the impact of this expected drawback.

303 This project was based on the work of the PT in community hospitals Powys and have not yet been  
304 transposed to primary care or district general hospitals. Also, the technology behind xPIRT Toolkit  
305 are dependent on Office 365 and Microsoft Power BI Premium licensing, which may be a limiting  
306 step for some pharmacy teams.

307 While it is known that PIs contribute for improved patient care and safety, as they optimise  
308 prescriptions and reduce and prevent medication errors, this measure of patient care and safety was  
309 not directly assessed throughout this project. A higher number of PI yields more representative data,  
310 true data, and xPIRT Toolkit can identify safety risks or unsafe care. However, it does not estimate  
311 harm, disability or death due to adverse events in inpatients.

312

## 313 **Conclusions**

314

315 In the beginning of the PDSA cycle 1, it was highlighted that the record of PI lacked representativity  
316 and significance. Besides the low number of interventions recorded, the team was not motivated and  
317 did not understand the importance of recording this data.

318 The results here presented showed that an effective recording tool, that reflects the organisation's  
319 wants and needs, is key for increasing the number of PI documented. xPIRT Dashboard created an  
320 automatically updated visual platform that organised data into infographics ready to be used for  
321 personal CPD, evidencing activity and impact, allowing service planning and informing clinical  
322 governance meetings, and identifying education/training needs.

323 Although it was reported that recording interventions may have drawn staff's attention from patients,  
324 it is yet to be known the impact of this expected drawback. Future work will evaluate the additional  
325 workload potentially associated with the use of xPIRT Toolkit. The long-term success of this project  
326 after PDSA cycle 2 will continue to be monitored.

327 This toolkit can be easily applied and adapted to other health organisations, settings and services and  
328 is expected to contribute positively to patient safety.

329

### 330 **Acknowledgments**

331 The authors would like to thank all hospital staff of the medicines management/pharmacy, Powys  
332 Teaching Health Board.

333

### 334 **Competing interests**

335 None declared

336

### 337 **Contributors**

338 Not applicable.

339

### 340 **Ethical approval**

341 Not applicable.

342

### 343 **Funding**

344 The publication costs of this quality improvement report have been supported by the Q Community,  
345 led by The Health Foundation.

## 346 References

347

- 348 1 Cardwell K, Smith SM, Clyne B, *et al.* Evaluation of the General Practice Pharmacist (GPP)  
349 intervention to optimise prescribing in Irish primary care: a non-randomised pilot study. *BMJ*  
350 *Open* 2020;**10**:e035087. doi:10.1136/bmjopen-2019-035087
- 351 2 Donaldson LJ, Kelley ET, Dhingra-Kumar N, *et al.* Medication Without Harm: WHO's Third  
352 Global Patient Safety Challenge. *Lancet* 2017;**389**:1680–1. doi:10.1016/S0140-  
353 6736(17)31047-4
- 354 3 Groppi JA, Ourth H, Morreale AP, *et al.* Advancement of clinical pharmacy practice through  
355 intervention capture. *American Journal of Health-System Pharmacy* 2018;**75**:886–92.  
356 doi:10.2146/ajhp170186
- 357 4 Fosnight S, King P, Ewald J, *et al.* Effects of pharmacy interventions at transitions of care on  
358 patient outcomes. *American Journal of Health-System Pharmacy* 2020;**77**:943–9.  
359 doi:10.1093/ajhp/zxaa081
- 360 5 van der Linden L, Hias J, Walgraeve K, *et al.* Clinical Pharmacy Services in Older Inpatients:  
361 An Evidence-Based Review. *Drugs & Aging* 2020;**37**:161–74. doi:10.1007/s40266-019-  
362 00733-1
- 363 6 Suzuki S, Horinouchi A, Uozumi S, *et al.* Impact of outpatient pharmacy interventions on  
364 management of thyroid patients receiving lenvatinib. *SAGE Open Medicine*  
365 2020;**8**:2050312120930906. doi:10.1177/2050312120930906
- 366 7 Zhao A, Dangerfield DT, Nunn A, *et al.* Pharmacy-Based Interventions to Increase Use of  
367 HIV Pre-exposure Prophylaxis in the United States: A Scoping Review. *AIDS and Behavior*  
368 Published Online First: 2021. doi:10.1007/s10461-021-03494-4
- 369 8 Presley B, Groot W, Pavlova M. Pharmacy-led interventions to improve medication adherence  
370 among adults with diabetes: A systematic review and meta-analysis. *Research in Social and*  
371 *Administrative Pharmacy* 2019;**15**:1057–67.  
372 doi:<https://doi.org/10.1016/j.sapharm.2018.09.021>
- 373 9 Ylä-Rautio H, Siissalo S, Leikola S. Drug-related problems and pharmacy interventions in  
374 non-prescription medication, with a focus on high-risk over-the-counter medications. *Int J*  
375 *Clin Pharm* 2020;**42**:786–95. doi:10.1007/s11096-020-00984-8
- 376 10 Christopher CM, KC B, Blebil A, *et al.* Clinical and Humanistic Outcomes of Community  
377 Pharmacy-Based Healthcare Interventions Regarding Medication Use in Older Adults: A  
378 Systematic Review and Meta-Analysis. *Healthcare* . 2021;**9**. doi:10.3390/healthcare9111577
- 379 11 Steed L, Sohanpal R, Todd A, *et al.* Community pharmacy interventions for health promotion:  
380 effects on professional practice and health outcomes. *Cochrane Database of Systematic*  
381 *Reviews* Published Online First: 2019. doi:10.1002/14651858.CD011207.pub2
- 382 12 Onatade R, Appiah S, Stephens M, *et al.* Evidence for the outcomes and impact of clinical  
383 pharmacy: Context of UK hospital pharmacy practice. *European Journal of Hospital*  
384 *Pharmacy* 2018;**25**:E21–8. doi:10.1136/ejhpharm-2017-001303
- 385 13 Jourdan J-P, Muzard A, Goyer I, *et al.* Impact of pharmacist interventions on clinical outcome  
386 and cost avoidance in a university teaching hospital. *International Journal of Clinical*  
387 *Pharmacy* 2018;**40**:1474–81. doi:10.1007/s11096-018-0733-6
- 388 14 Mi X, Su X, Jin Z, *et al.* Economic evaluations of clinical pharmacy services in China: a  
389 systematic review. *BMJ Open* 2020;**10**:e034862. doi:10.1136/bmjopen-2019-034862
- 390 15 Dalton K, Byrne S. Role of the pharmacist in reducing healthcare costs: current insights.  
391 *Integr Pharm Res Pract* 2017;**6**:37–46. doi:10.2147/IPRP.S108047
- 392 16 Al-jedai A. Electronic Documentation of Clinical Pharmacy Interventions in Hospitals. In:  
393 Karahoca ZANE-A, ed. . Rijeka: : IntechOpen 2012. Ch. 7. doi:10.5772/50425

- 394 17 Fernández-Llamazares CM, Manrique-Rodríguez S, Pérez-Sanz C, *et al.* Validation of a  
395 method for recording pharmaceutical interventions. *J Clin Pharm Ther* 2012;**37**:459–63.  
396 doi:10.1111/j.1365-2710.2011.01328.x
- 397 18 Vo HT, Charpiat B, Chanoine S, *et al.* CLEO: a multidimensional tool to assess clinical,  
398 economic and organisational impacts of pharmacists' interventions. *European Journal of*  
399 *Hospital Pharmacy* 2021;**28**:193 LP – 200. doi:10.1136/ejhpharm-2020-002642
- 400 19 Allenet B, Bedouch P, Rose F-X, *et al.* Validation of an instrument for the documentation of  
401 clinical pharmacists' interventions. *Pharmacy World and Science* 2006;**28**:181–8.  
402 doi:10.1007/s11096-006-9027-5
- 403 20 Bedouch P, Sylvoz N, Charpiat B, *et al.* Trends in pharmacists' medication order review in  
404 French hospitals from 2006 to 2009: analysis of pharmacists' interventions from the Act-IP©  
405 website observatory. *J Clin Pharm Ther* 2015;**40**:32–40. doi:10.1111/jcpt.12214
- 406 21 Mongaret C, Quillet P, Vo TH, *et al.* Predictive factors for clinically significant pharmacist  
407 interventions at hospital admission. *Medicine* 2018;**97**:e9865.  
408 doi:10.1097/MD.00000000000009865
- 409 22 Vo T-H, Charpiat B, Catoire C, *et al.* Tools for Assessing Potential Significance of Pharmacist  
410 Interventions: A Systematic Review. *Drug Saf* 2016;**39**:131–46. doi:10.1007/s40264-015-  
411 0370-0
- 412 23 McNab D, McKay J, Shorrocks S, *et al.* Development and application of systems thinking  
413 principles for quality improvement. *BMJ Open Quality* 2020;**9**. doi:10.1136/bmjopen-  
414 000714
- 415 24 Eljiz K, Greenfield D, Hogden A, *et al.* Improving knowledge translation for increased  
416 engagement and impact in healthcare. *BMJ Open Quality* 2020;**9**. doi:10.1136/bmjopen-  
417 000983
- 418 25 Frampton A, Fox F, Hollowood A, *et al.* Using real-time, anonymous staff feedback to  
419 improve staff experience and engagement. *BMJ Open Quality* 2017;**6**.  
420 doi:10.1136/bmjquality.u220946.w7041
- 421 26 Espin S, Indar A, Gross M, *et al.* Processes and tools to improve teamwork and  
422 communication in surgical settings: a narrative review. *BMJ Open Quality* 2020;**9**.  
423 doi:10.1136/bmjopen-2020-000937
- 424 27 Dixon-Woods M, McNicol S, Martin G. Ten challenges in improving quality in healthcare:  
425 lessons from the Health Foundations programme evaluations and relevant literature. *BMJ*  
426 *Quality & Safety* 2012;**21**:876–84. doi:10.1136/bmjqs-2011-000760
- 427 28 Purdy EI, McLean D, Alexander C, *et al.* Doing our work better, together: a relationship-  
428 based approach to defining the quality improvement agenda in trauma care. *BMJ Open*  
429 *Quality* 2020;**9**. doi:10.1136/bmjopen-2019-000749
- 430 29 Breckenridge JP, Gray N, Toma M, *et al.* Motivating Change: a grounded theory of how to  
431 achieve large-scale, sustained change, co-created with improvement organisations across the  
432 UK. *BMJ Open Quality* 2019;**8**. doi:10.1136/bmjopen-2018-000553
- 433 30 Siddiqui R, Naimi N al, Hassan RN, *et al.* 3 Value improvement methods across a healthcare  
434 system demonstrating rapid results and innovative emergence of practical evidence of  
435 improvement. *BMJ Open Quality* 2020;**9**:A3--A6. doi:10.1136/bmjopen-2020-IHI.3

436  
437  
438  
439  
440  
441

442

443 Figure 1. A - Total number of interventions recorded on xPIRT (blue line) and target established for the project (orange  
444 line). The target was met during PDSA cycle 2. B – Total number of pharmacy team (PT) staffing recording interactions  
445 via xPIRT (blue line) and target established for the project (dashed orange line). This target was met during PDSA cycle  
446 2.

447

448 Figure 2. Number of interventions recorded on xPIRT and respective median. Background data was obtained via All  
449 Wales Intervention Database (AWID): interventions recorded in ‘A’ represent an attempt to use AWID, showing to be  
450 unsuccessful after March 2021; astronomical points ‘B’ and ‘C’ demonstrate that AWID does not allow the user to  
451 choose the interventions dates, thus concentrating all recordings in the same date, when interventions are submitted.  
452 PDSA cycle 1 and 2 are evidenced with the red and green areas, respectively.

453

**A**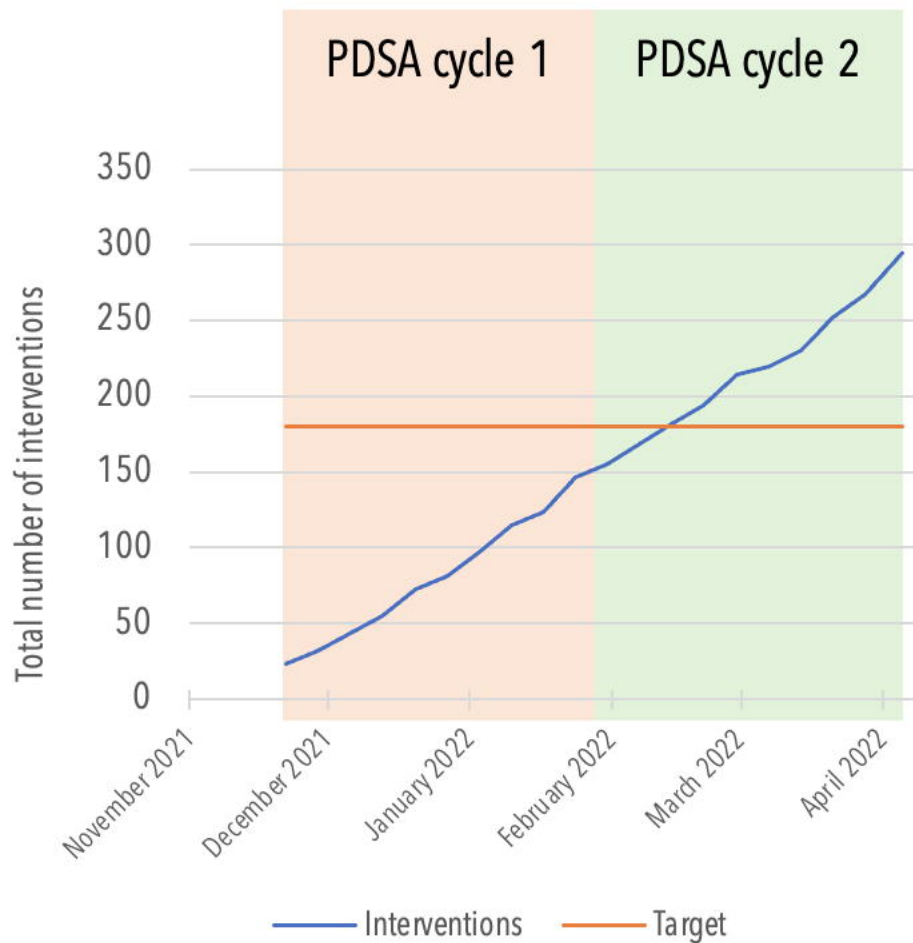**B**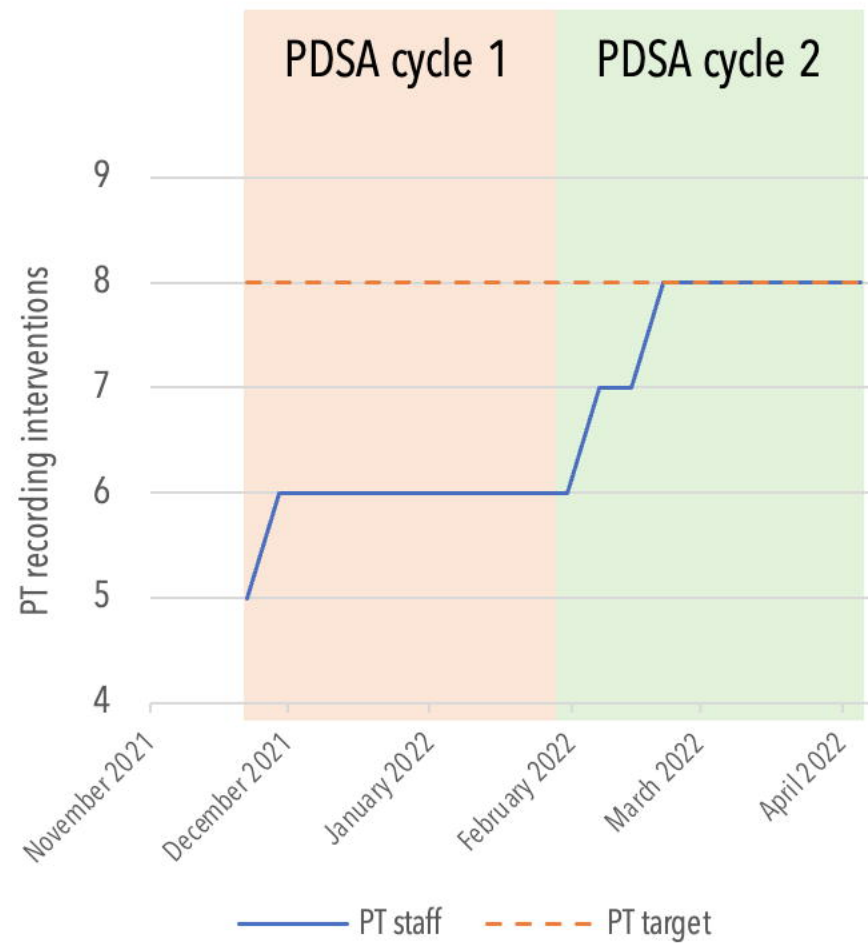

Number of interventions

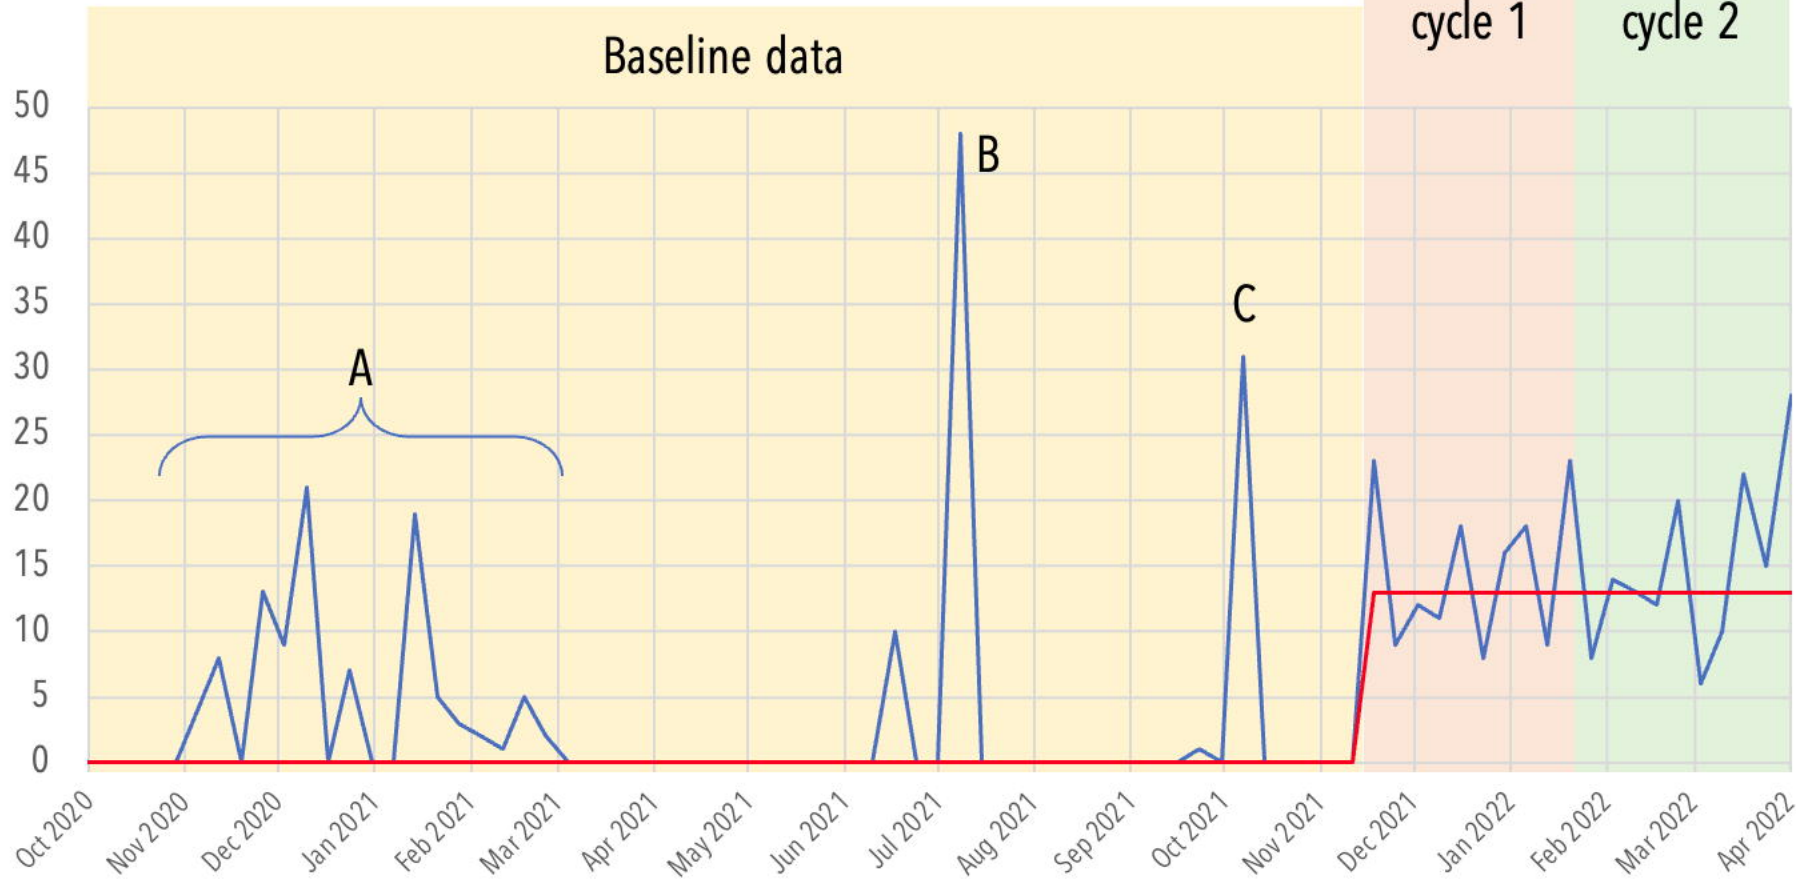

Interventions

Median
